# Supplementary material
Source: publisher site journal article supplement (https://www.dovepress.com/article/306789)

**A**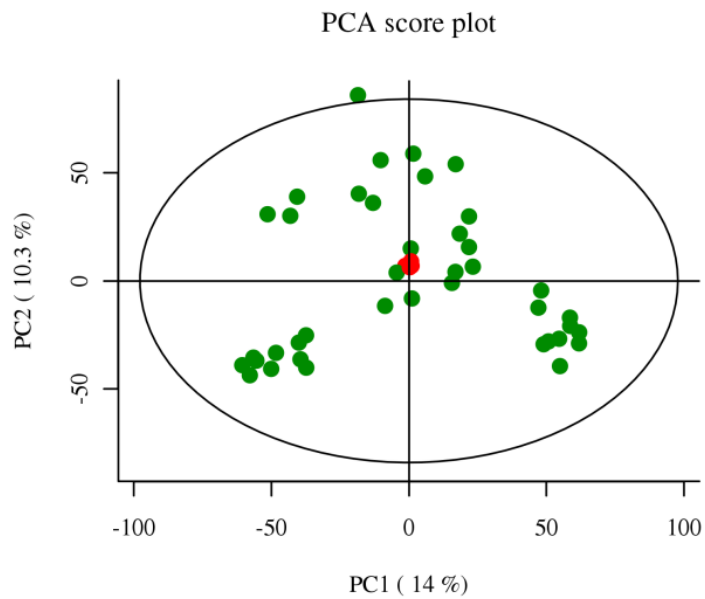**B**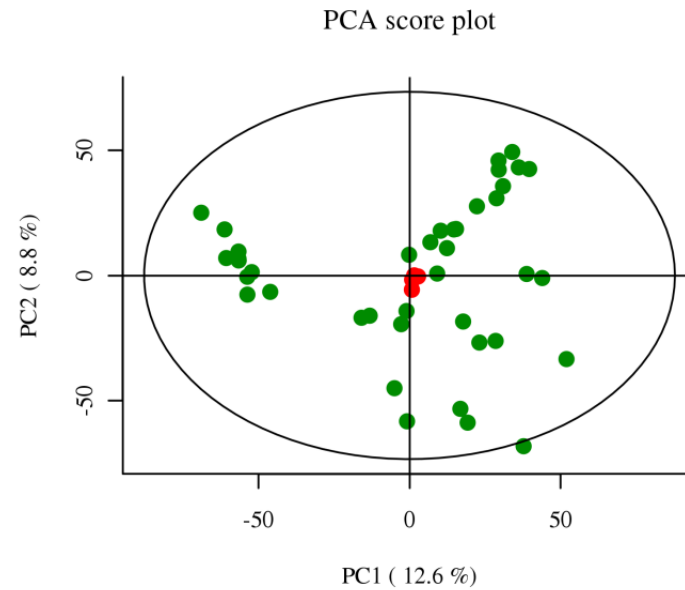

Quality control (QC) diagram overlaid in positive (A) and negative ion modes (B).

Supplement: Supplementary file 1 [file get_supplementary_file.php]
